# Supplementary material for: A Moexitecan Magnetic Liposomal Strategy for Ferroptosis-Enhanced Chemotherapy
Source: MDPI journal article supplement (doi:10.3390/pharmaceutics15072012), 2023-07-24
Supplement: s1 [file s1]

## Supplementary Information

# A Moexitecan Magnetic Liposomal Strategy for Ferroptosis-Enhanced Chemotherapy

Weiling Miao <sup>†</sup>, Yang Liu <sup>†</sup>, Jian Tang, Tiandong Chen and Fang Yang <sup>\*</sup>

State Key Laboratory of Digital Medical Engineering, Jiangsu Key Laboratory for Biomaterials and Devices, School of Biological Sciences and Medical Engineering, Southeast University; Nanjing 210096, China; weiling\_miao@seu.edu.cn (W.M.); lyseubme@seu.edu.cn (Y.L.); jiantang@seu.edu.cn (J.T.); 230218251@seu.edu.cn (T.C.)

<sup>\*</sup> Correspondence: yangfang2080@seu.edu.cn

<sup>†</sup> These authors contributed equally to this work.

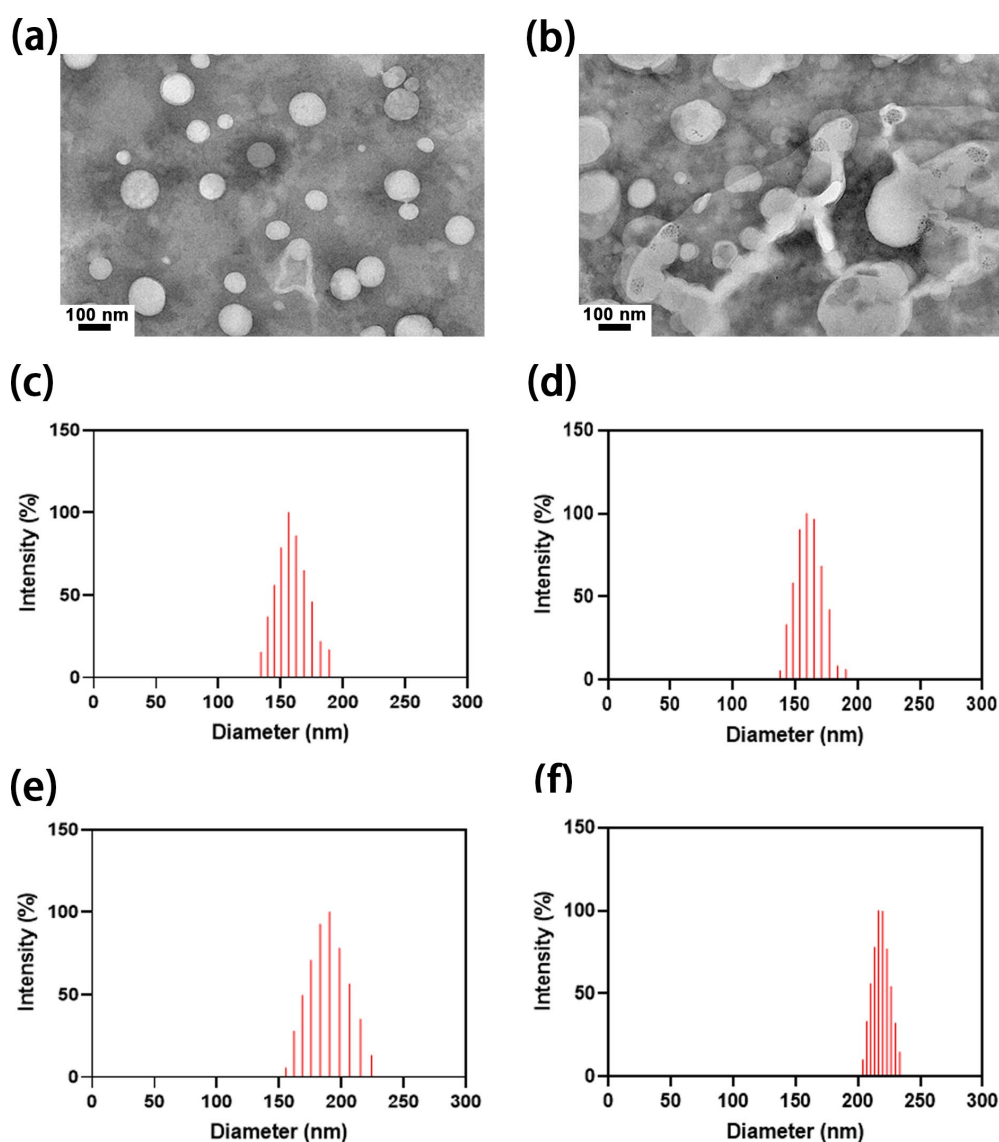

**Figure S1.** TEM images of (a) DIO/Mex@Lipo and (b) DIO/Mex@MLipo; Hydrodynamic size distribution of (c,d) Mex@Lipo and (e,f) Mex@MLipo.

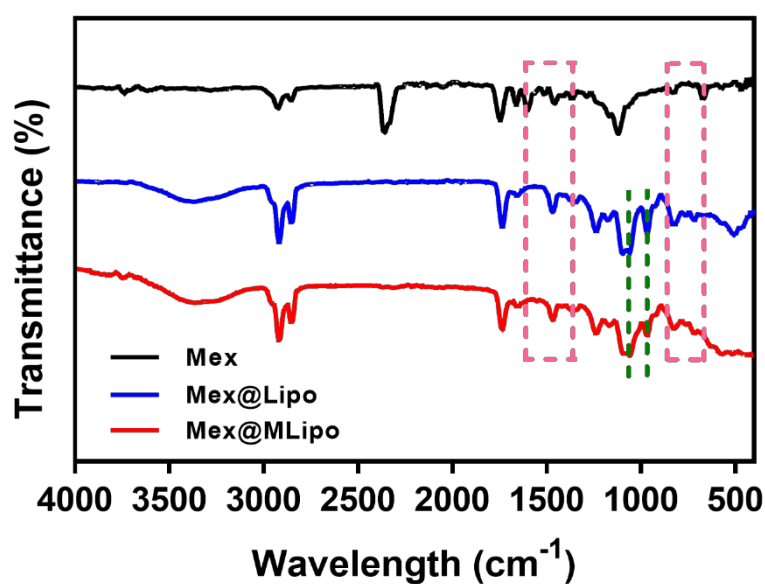

**Figure S2.** The Fourier transform infrared spectroscopy (FT-IR) spectrum of the Mex, Mex@Lipo and Mex@MLipo.

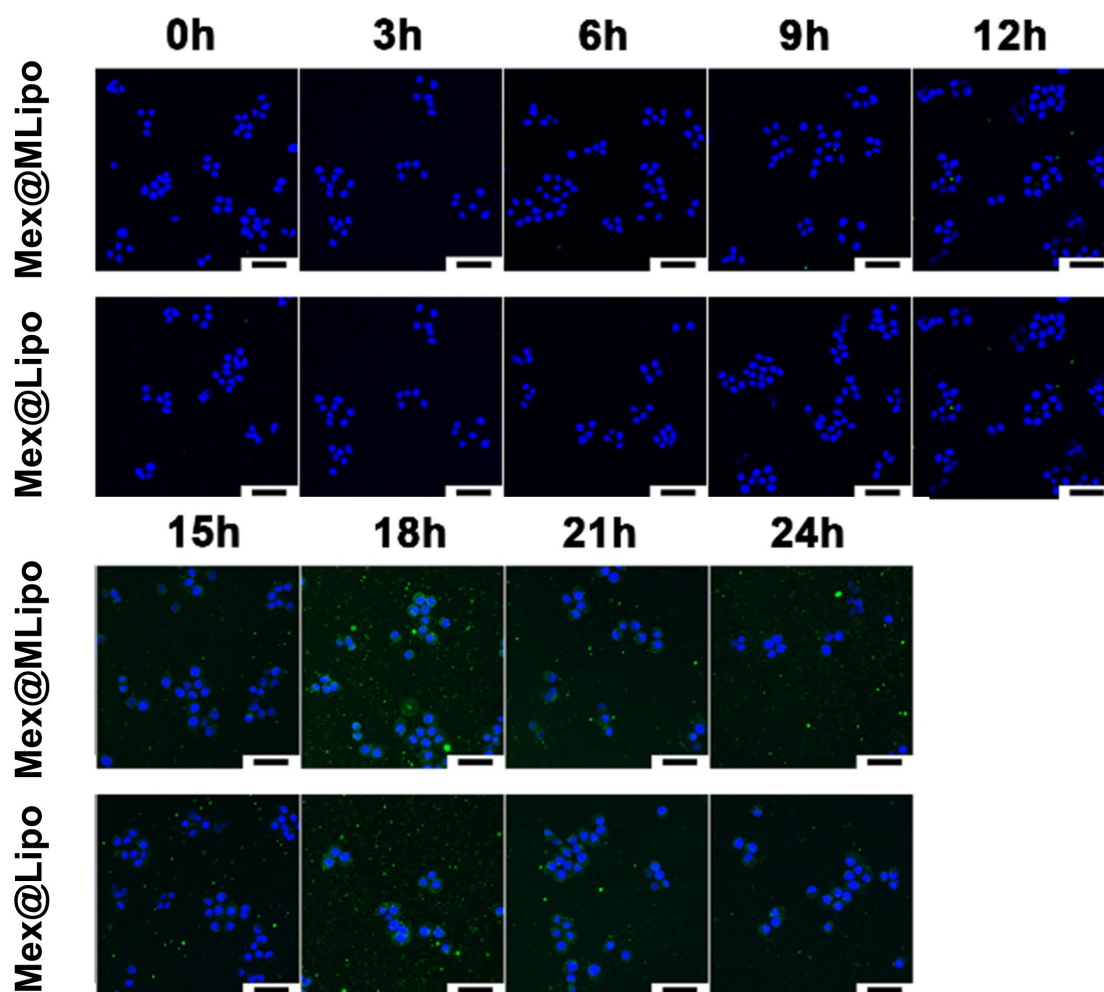

**Figure S3.** Confocal images of HT-29 cells co-cultured with DIO/Mex@MLipo and DIO/Mex@Lipo at 0, 3, 6, 9, 12, 15, 18, 21, and 24 h. Blue fluorescence represents nucleus and green fluorescence represents liposome materials. All scale bars: 50  $\mu\text{m}$ .

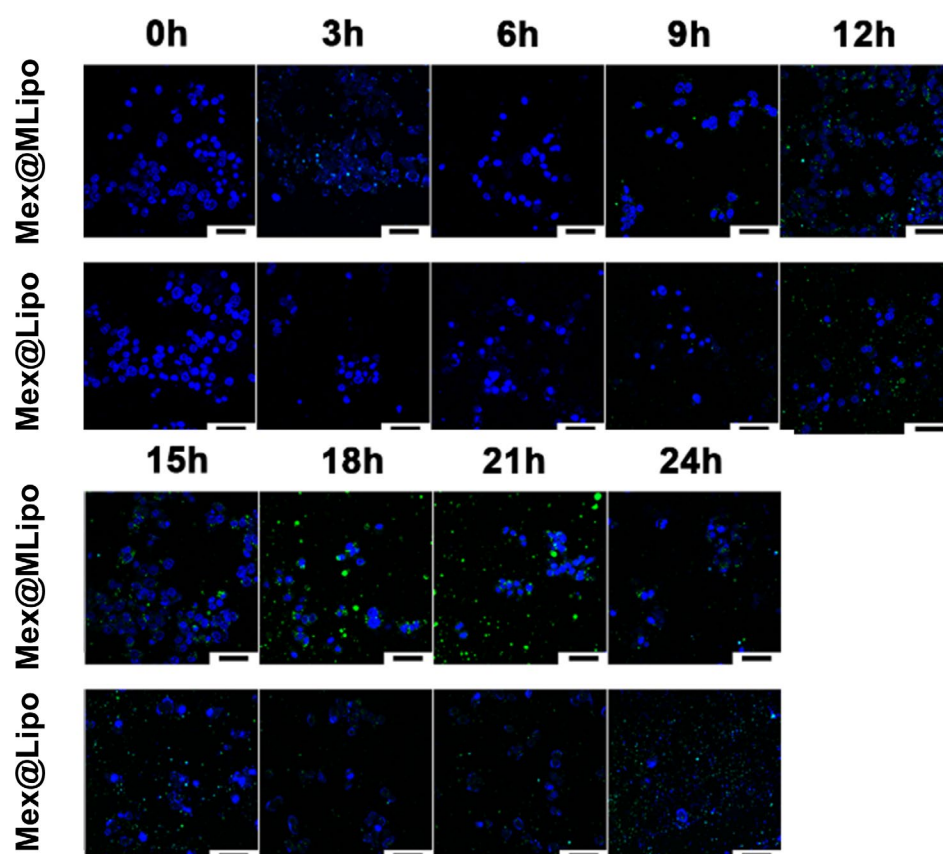

**Figure S4.** Confocal images of HepG-2 cells co-cultured with DIO/Mex@MLipo and DIO/Mex@Lipo at 0, 3, 6, 9, 12, 15, 18, 21, and 24 h. Blue fluorescence represents nucleus and green fluorescence represents liposome materials. All scale bars: 50 μm.

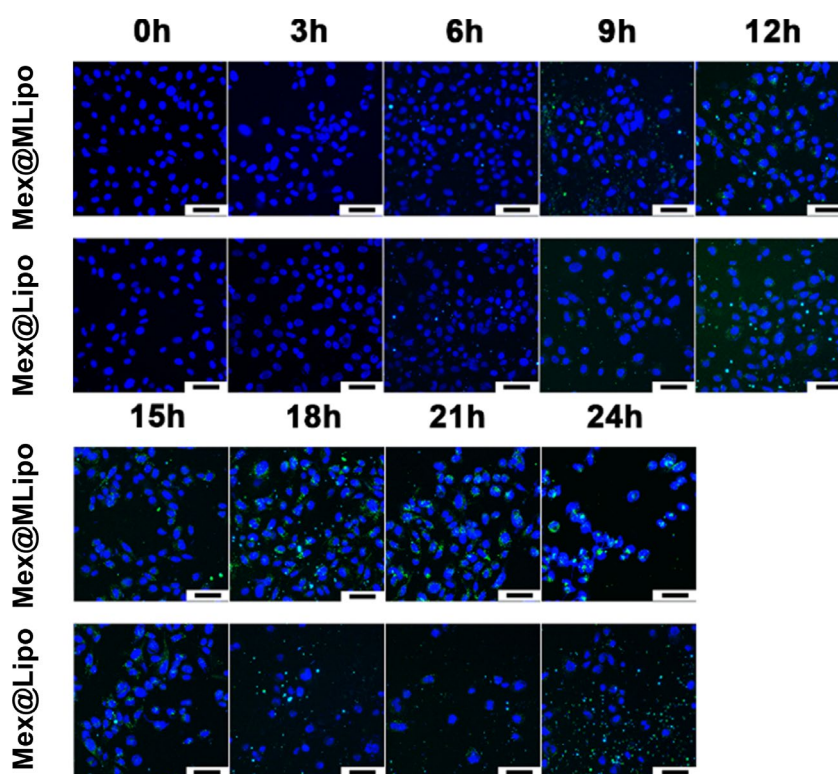

**Figure S5.** Confocal images of PC-3 cells co-cultured with DIO/Mex@MLipo and DIO/Mex@Lipo at 0, 3, 6, 9, 12, 15, 18, 21, and 24 h. Blue fluorescence represents nucleus and green fluorescence represents liposome materials. All scale bars: 50 μm.

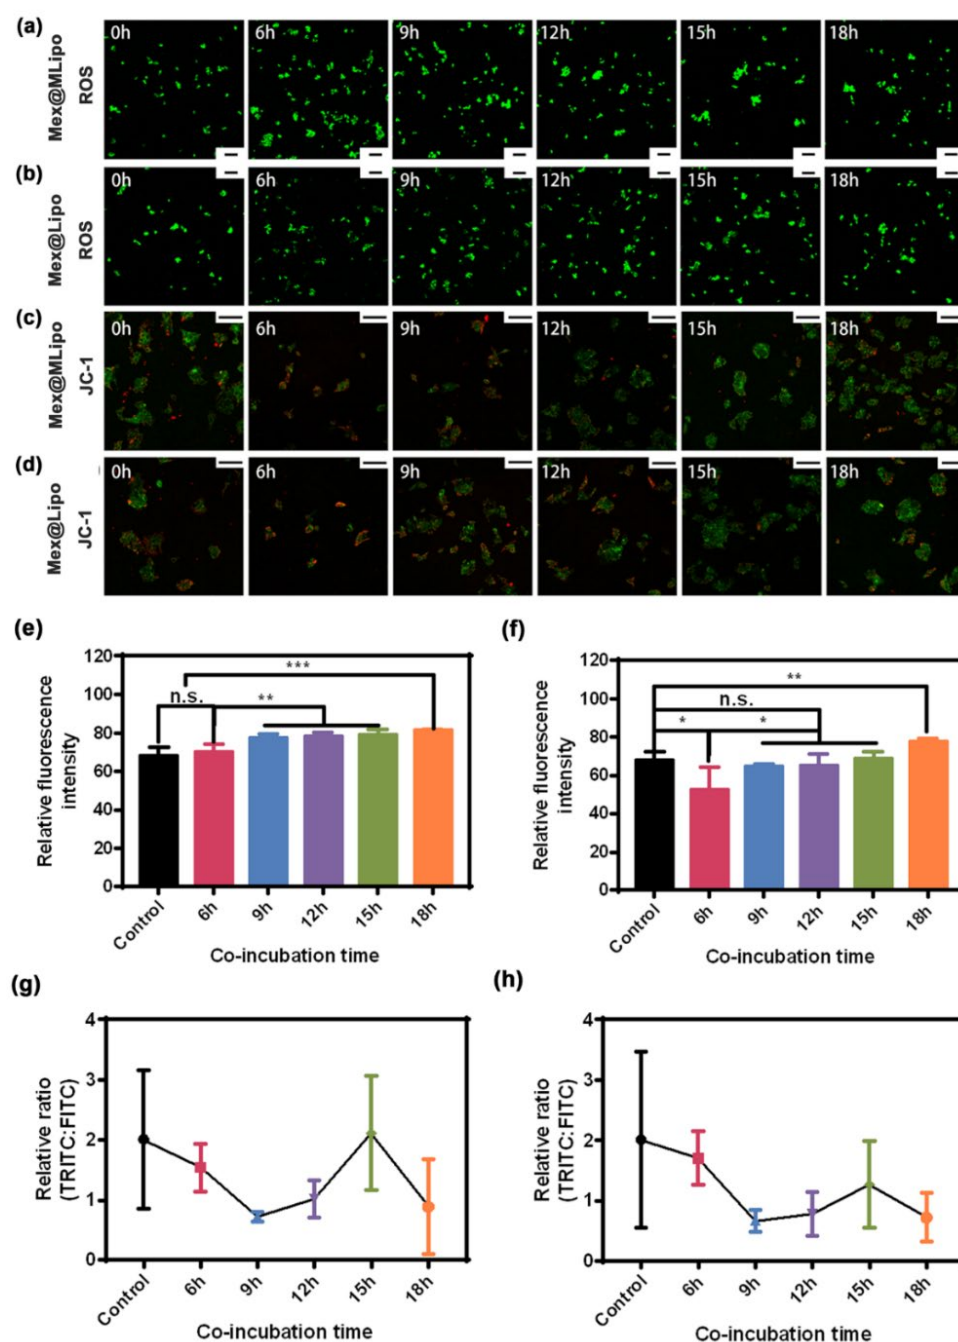

**Figure S6.** Images of intracellular ROS fluorescence of HepG-2 cells after co-incubation with Mex@MLipo (a) and Mex@Lipo (b) and quantitative analysis of fluorescence intensity respectively (e,f); Images of JC-1 fluorescence of HepG-2 cells after co-incubation with Mex@MLipo (c) and Mex@Lipo (d) and quantitative analysis of fluorescence intensity respectively (g,h). All scale bars: 100  $\mu$ m. Error bars: mean  $\pm$  SD (n = 5). The statistical significance is indicated by n.s.: not statistically significant,  $0.0001 < ***p \leq 0.001$ ,  $0.001 < **p \leq 0.01$  and  $0.01 < *p \leq 0.05$ , using an unpaired Student's t-test (two-tailed).



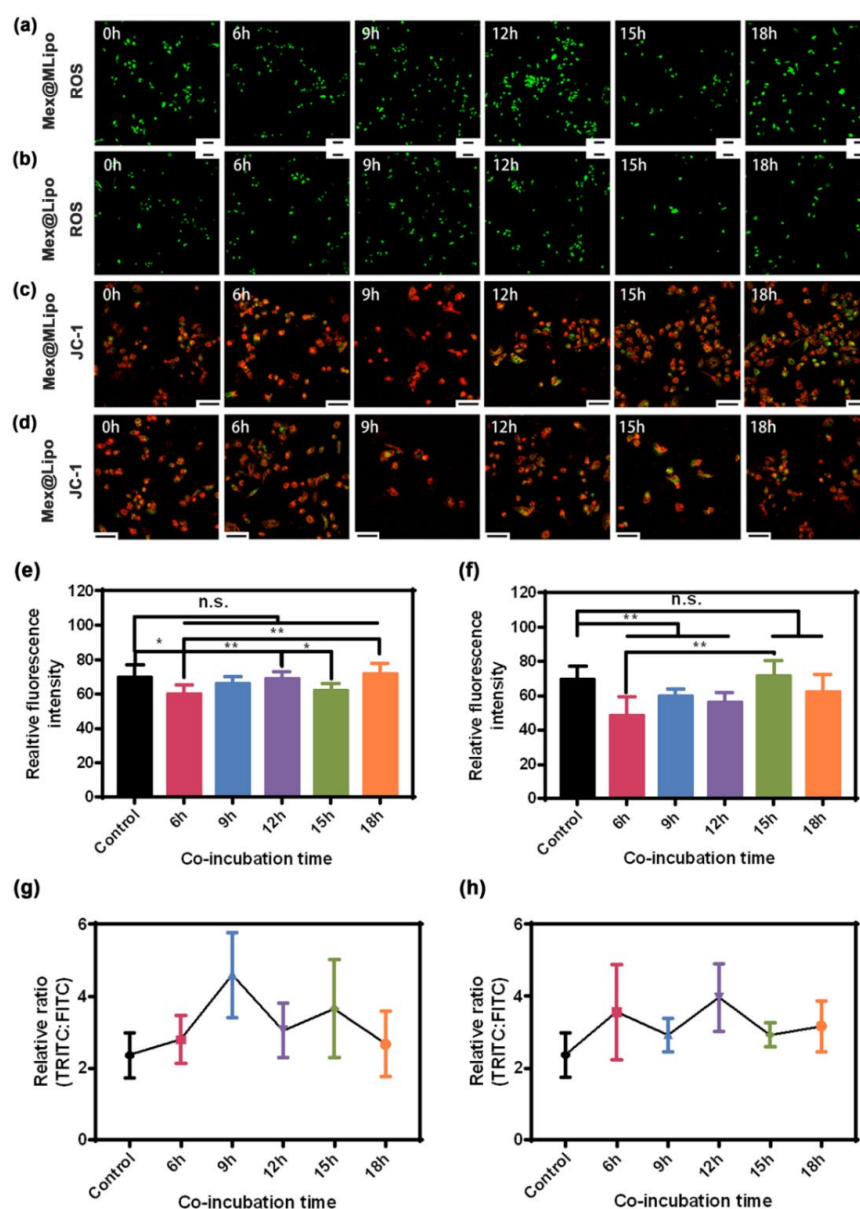

**Figure S7.** Images of intracellular ROS fluorescence of PC-3 cells after co-incubation with Mex@MLipo (a) and Mex@Lipo (b) and quantitative analysis of fluorescence intensity respectively (e,f); Images of JC-1 fluorescence of PC-3 cells after co-incubation with Mex@MLipo (c) and Mex@Lipo (d) and quantitative analysis of fluorescence intensity respectively (g,h). All scale bars: 100  $\mu$ m. Error bars: mean  $\pm$  SD (n = 5). The statistical significance is indicated by n.s.: not statistically significant,  $0.001 < **p \leq 0.01$  and  $0.01 < *p \leq 0.05$ , using an unpaired Student's t-test (two-tailed).

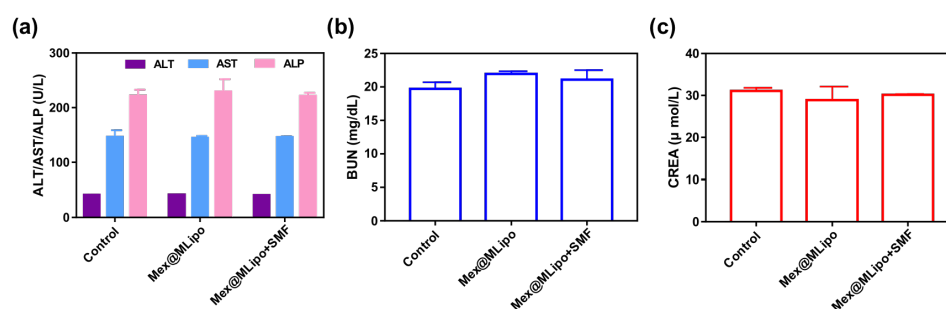

**Figure S8.** (a) Serum levels of ALT, AST and ALP in the different treatment groups. (b) BUN and (c) CREA levels in different treatment groups of mice.
